# Supplementary material for: Iodine speciation and size distribution in ambient aerosols at a coastal new particle formation hotspot of China
Source: Copernicus journal article supplement (doi:10.5194/acp-2018-1353), 2019-01-04
Supplement: Supplementary file 1 [file acp-2018-1353-supplement.pdf]

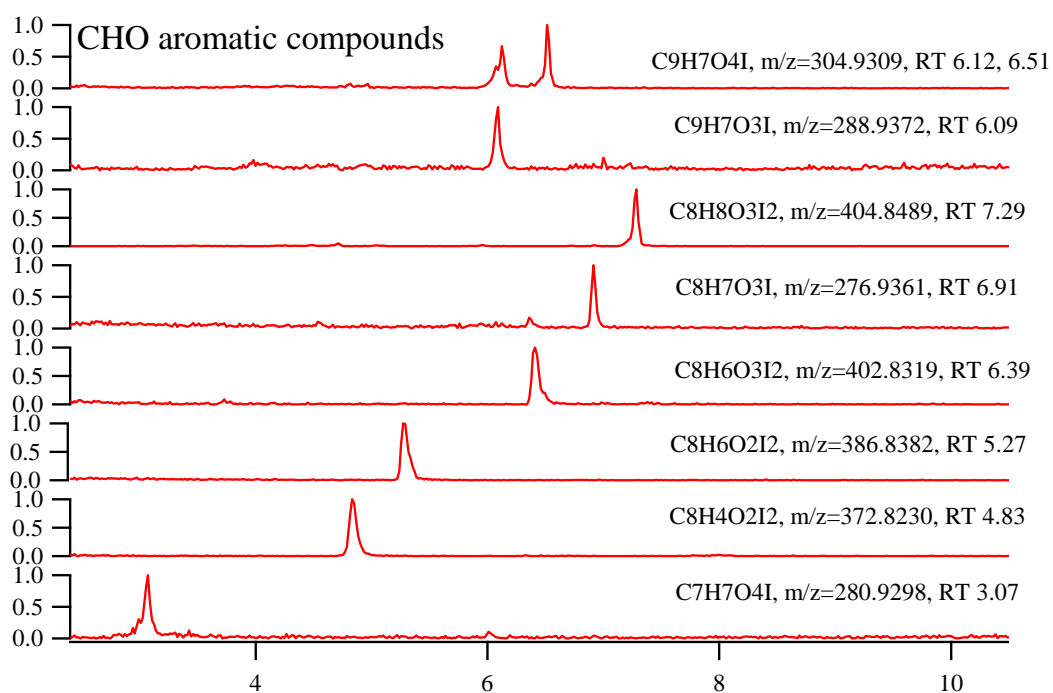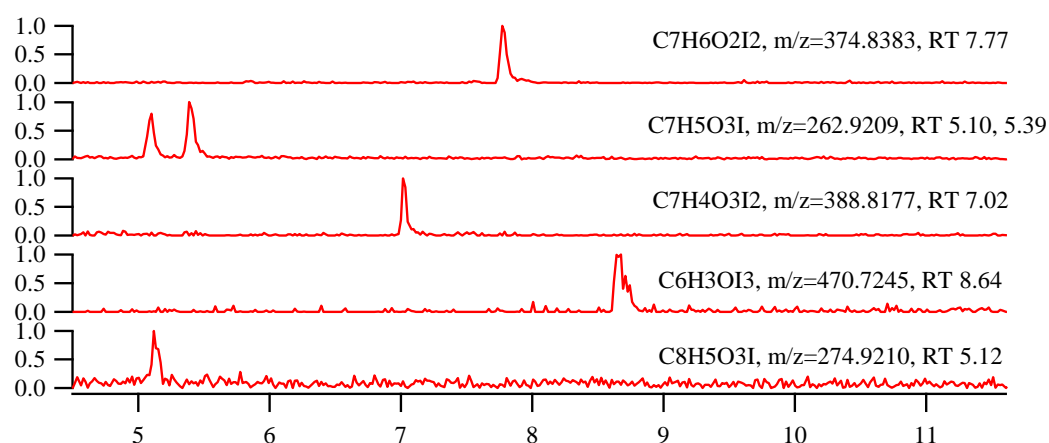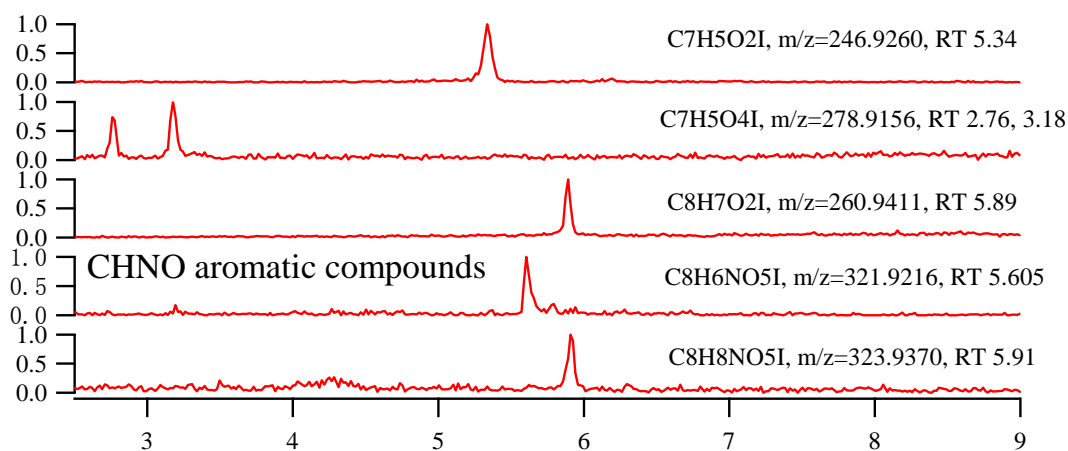

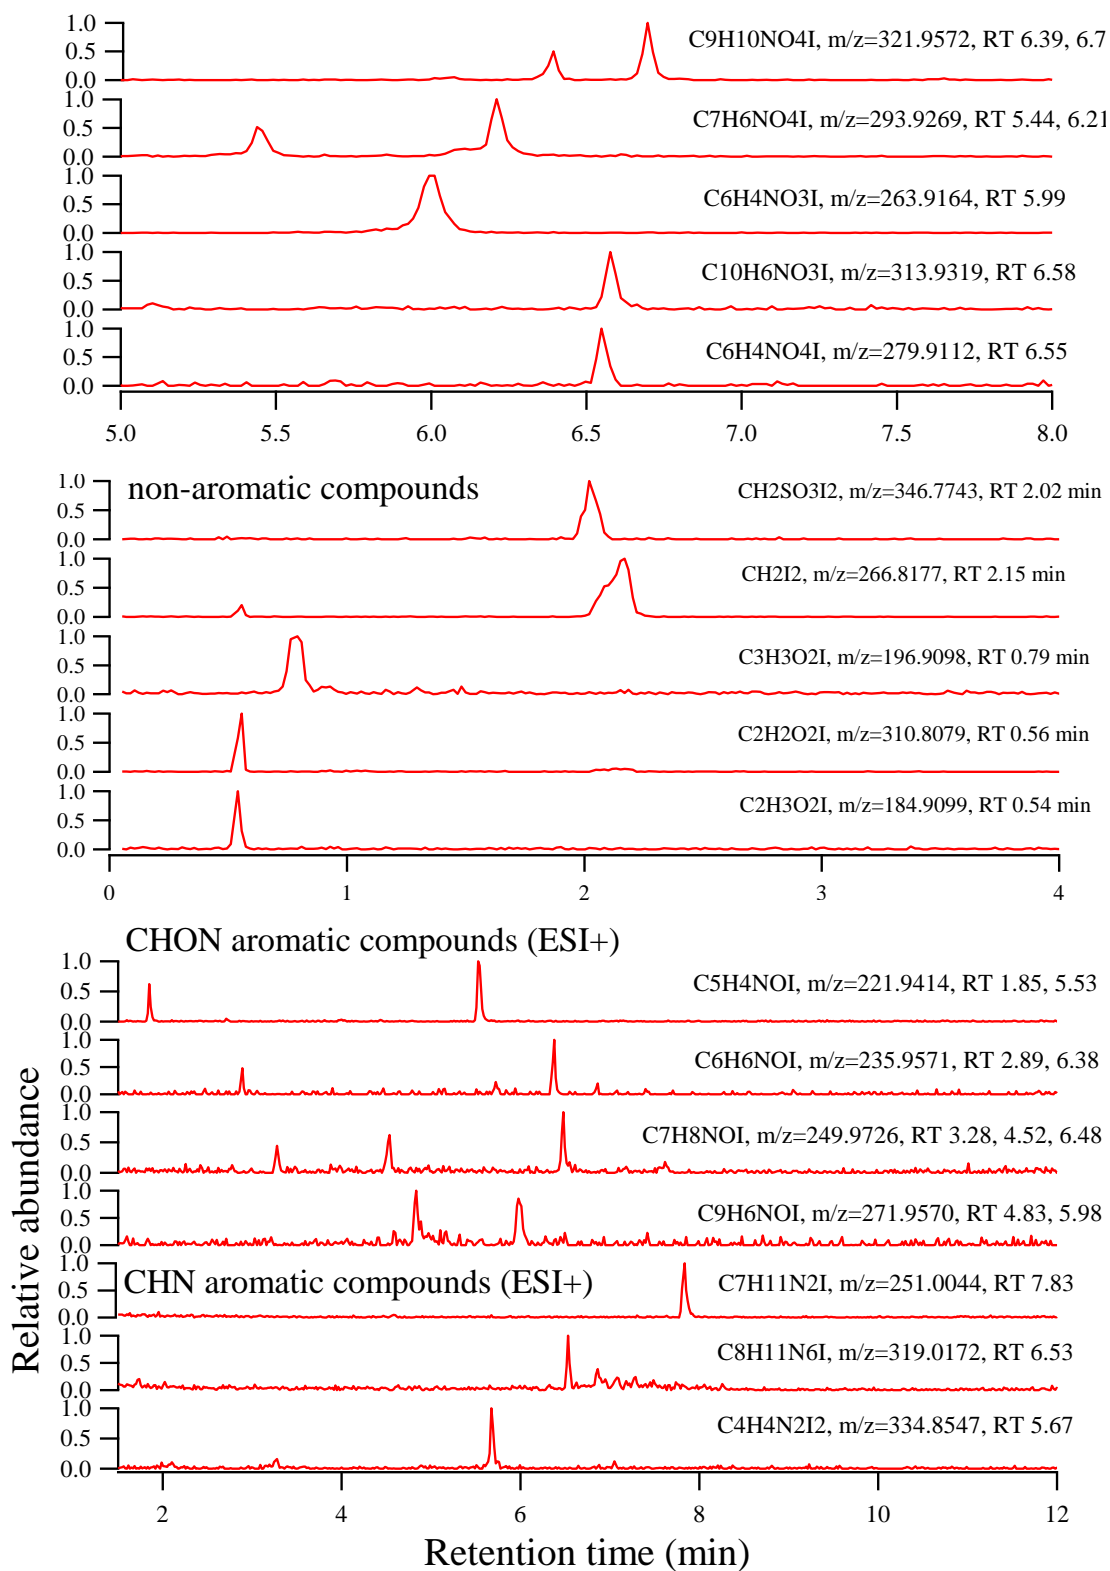

Figure S1. Extracted ion chromatograms and retention times (RT) of 34 molecular formulas identified in the aerosol samples collected at the coastal site. Data were extracted in ESI- mode, unless otherwise noted. Chromatograms were extracted with 4 mDa mass window.
